# Supplementary material for: Isolation and Molecular Characterization of Two Novel Lytic Bacteriophages for the Biocontrol of Escherichia coli in Uterine Infections: In Vitro and Ex Vivo Preliminary Studies in Veterinary Medicine
Source: MDPI journal article supplement (doi:10.3390/pharmaceutics14112344), 2022-10-30
Supplement: s1 [file s1]

**Supplementary Table S1.** Data utilized to prepare calibration curves aiming at determining the molar extinction coefficients of phages vB\_EcoM\_Uniso11 and vB\_EcoM\_Uniso21 (whole) particles.

| Concentrated phage suspension (μL) | Final volume of dilution (μL) | Phage  | Number of PFU's in the concentrated phage suspension | Phage particle concentration (PFU/mL) | Abs <sub>255 nm</sub> | Abs <sub>320 nm</sub> | Abs <sub>255nm</sub> -Abs <sub>320nm</sub> |
|------------------------------------|-------------------------------|--------|------------------------------------------------------|---------------------------------------|-----------------------|-----------------------|--------------------------------------------|
| 25                                 | 2000                          | ph0011 | 4.9750x10 <sup>08</sup>                              | 2.4875x10 <sup>08</sup>               | 0.5988                | 0.2121                | 0.3867                                     |
|                                    |                               | ph0021 | 6.1000x10 <sup>08</sup>                              | 3.0500x10 <sup>08</sup>               | 0.5697                | 0.0784                | 0.4913                                     |
| 50                                 | 2000                          | ph0011 | 9.9500x10 <sup>08</sup>                              | 4.9750x10 <sup>08</sup>               | 0.7499                | 0.3032                | 0.4467                                     |
|                                    |                               | ph0021 | 1.2200x10 <sup>09</sup>                              | 6.1000x10 <sup>08</sup>               | 0.8732                | 0.2534                | 0.6198                                     |
| 100                                | 2000                          | ph0011 | 1.9900x10 <sup>09</sup>                              | 9.9500x10 <sup>08</sup>               | 1.1568                | 0.5236                | 0.6332                                     |
|                                    |                               | ph0021 | 2.4400x10 <sup>09</sup>                              | 1.2200x10 <sup>09</sup>               | 1.1254                | 0.3992                | 0.7262                                     |
| 150                                | 2000                          | ph0011 | 2.9850x10 <sup>09</sup>                              | 1.4925x10 <sup>09</sup>               | 1.4330                | 0.6839                | 0.7491                                     |
|                                    |                               | ph0021 | 3.6600x10 <sup>09</sup>                              | 1.8300x10 <sup>09</sup>               | 1.5369                | 0.6286                | 0.9083                                     |
| 200                                | 2000                          | ph0011 | 3.9800x10 <sup>09</sup>                              | 1.9900x10 <sup>09</sup>               | 1.8420                | 0.9364                | 0.9056                                     |
|                                    |                               | ph0021 | 4.8800x10 <sup>09</sup>                              | 2.4400x10 <sup>09</sup>               | 1.9838                | 0.8754                | 1.1084                                     |
